# Supplementary material
Source: PubMed Central journal article supplement (PMC8893195)
Supplement: glab352_suppl_supplementary_materials.pdf [file glab352_suppl_supplementary_materials.pdf]

**Supplementary online-only material:**

**Supplementary Figure 1.** Electroencephalography map of a delirium patient.

**Supplementary Figure 2.** Example of phase shuffling.

**Supplementary Figure 3.** Data distribution.

**Supplementary Figure 4.** Lempel Ziv Complexity correlation with slow wave activity (SWA).

**Supplementary Figure 5.** Surface Laplacian: Delirium severity (DRS) is associated with decreased Lempel Ziv Complexity (LZC).

**Supplementary Figure 6.** Surface Laplacian: Delirium severity (DRS) correlation with slow wave activity (SWA).

**Supplementary Table 1.** Inclusion and exclusion criteria for the IPOD-B2 cohort (NCT02926417).

**Supplementary Table 2.** Inclusion and exclusion criteria for the IPOD-B3 cohort (NCT03124303).

**Supplementary Table 3.** Clinical and demographic data for the cohort

**Supplementary Table 4.** Linear regression

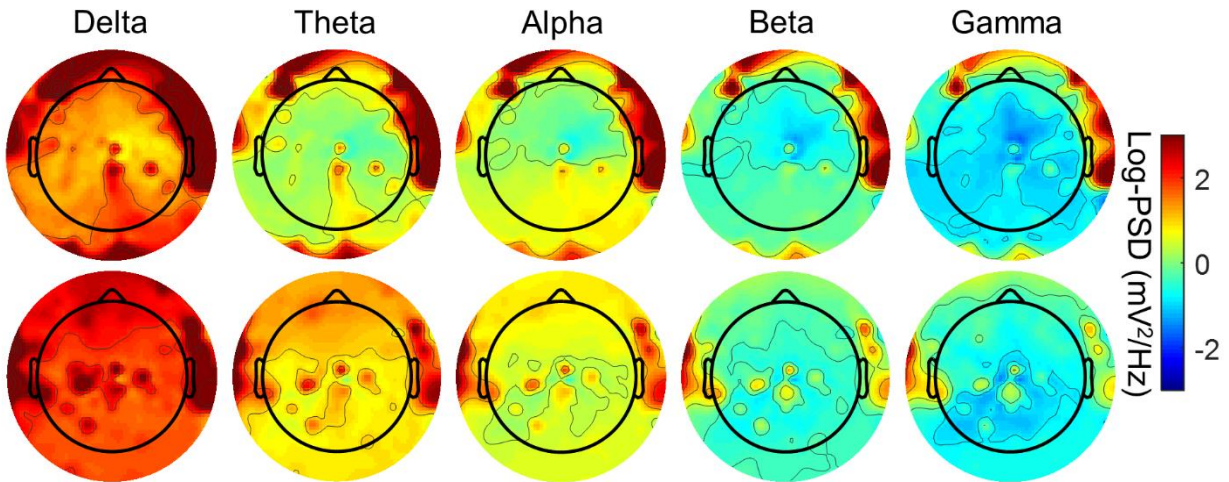

**Supplementary Figure 1. Electroencephalography map of a delirium patient.** Pre-operation (top row) and post-operation (bottom row). Unprocessed data.

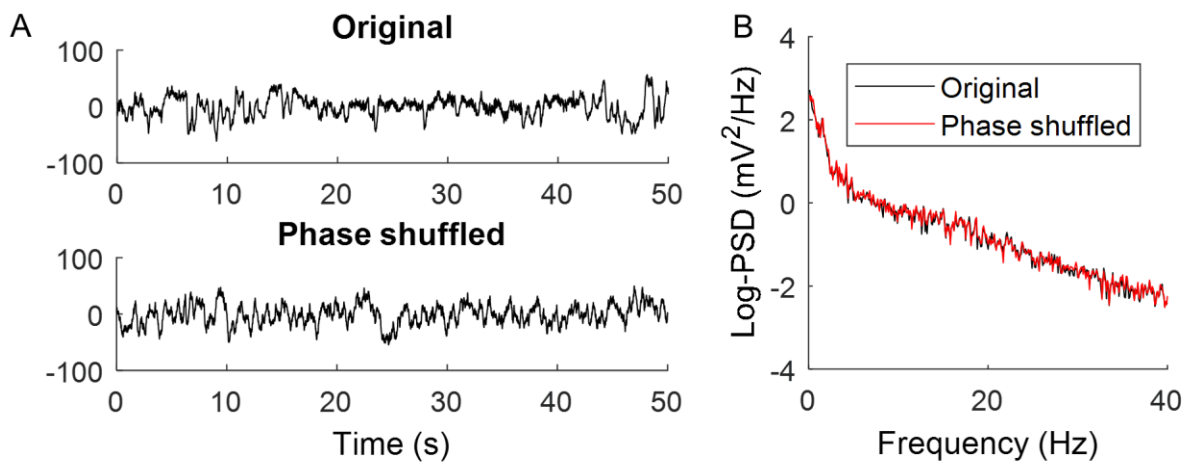

**Supplementary Figure 2. Example of phase shuffling.** (A) Electroencephalography timeseries before and after phase shuffling. (B) Phase shuffling sustains the power spectra while randomizing the signal phase.

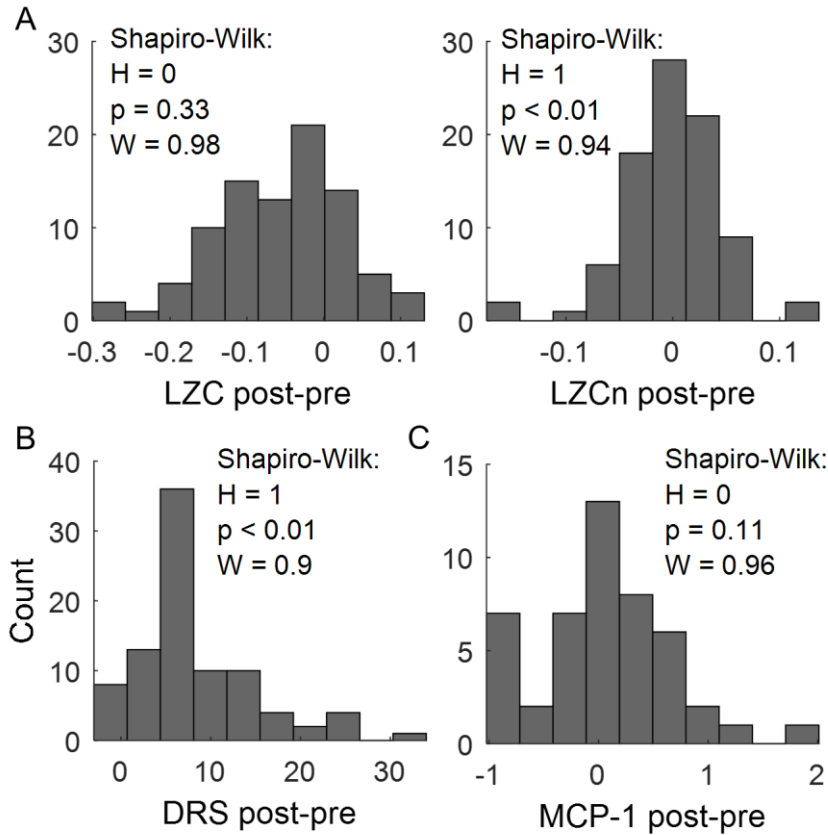

**Supplementary Figure 3. Data distribution.** Shapiro-Walk test for normality on (A) LZC/LZCn ( $n = 88$ , channel 179), (B) DRS ( $n = 88$ ) and (C) MCP-1 ( $n = 47$ ).

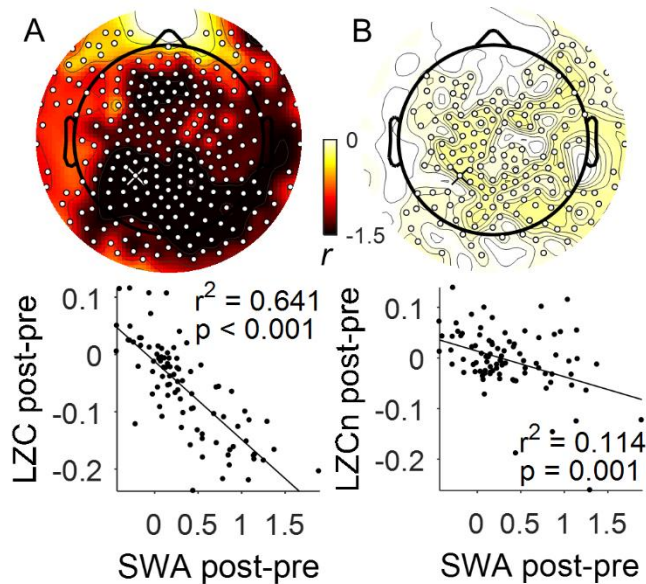

**Supplementary Figure 4. Lempel Ziv Complexity correlation with slow wave activity (SWA).** (A) LZC analysis ( $n = 89$ ) and (B) LZCn analysis ( $n = 89$ ) with statically significant electrodes shown by white dots (corrected TFCE  $P < 0.05$ ). SWA was defined as  $\log_{10}$

transformed power spectral density at 0.5-6Hz. Example Spearman's correlation plotted at 90th percentile effect size overlapping between LZC and LZCn, shown by white and black "X" (channel 87).

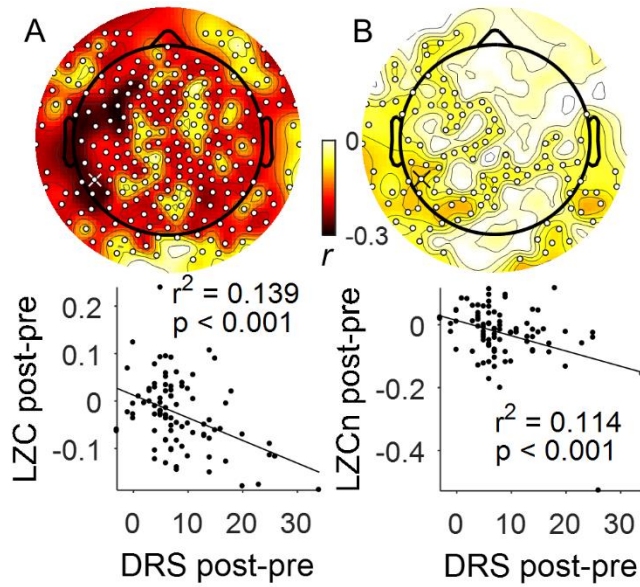

**Supplementary Figure 5. Surface Laplacian: Delirium severity (DRS) is associated with decreased Lempel Ziv Complexity (LZC).** Repeating figure 2 after applying surface Laplacian (Legendre polynomial 40,  $\lambda = 10^{-5}$ ) before LZC calculation. Correlation of change in DRS with (A) LZC ( $n = 88$ ) and (B) LZCn ( $n = 88$ ) with statically significant electrodes shown by white dots (corrected TFCE  $P < 0.05$ ). Example channel Spearman's correlation with DRS plotted at 90th percentile effect size overlapping between LZC and LZCn, shown by white "X" in (A) and black "X" in (B) (channel 179).

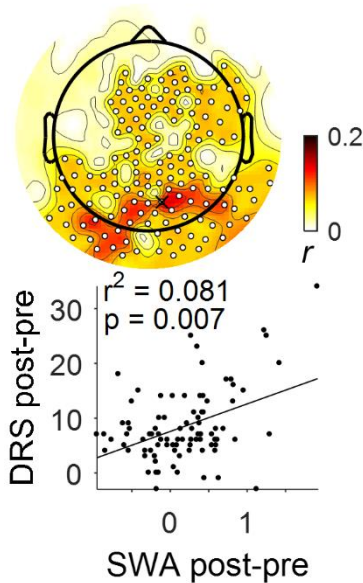

**Supplementary Figure 6. Surface Laplacian: Delirium severity (DRS) correlation with slow wave activity (SWA).** SWA calculation after surface Laplacian (Legendre polynomial 40,

lambda  $10^{-5}$ ). Correlation of change in DRS with SWA (n = 88) with statically significant electrodes shown by white dots (corrected TFCE  $P < 0.05$ ). Example channel Spearman's correlation with SWA plotted at peak effect size (black "X", channel 139).

**Supplementary Table 1. Inclusion and exclusion criteria for the IPOD-B2 cohort (NCT02926417).**

| Inclusion Criteria                                                                                                                  | Exclusion Criteria                                                                                                     |
|-------------------------------------------------------------------------------------------------------------------------------------|------------------------------------------------------------------------------------------------------------------------|
| 1. Adult (>21 years old)                                                                                                            | 1. Contraindication for spinal drain                                                                                   |
| 2. Patients scheduled for an elective open thoracoabdominal aortic aneurysm or TEVAR (thoracic endovascular aortic/aneurysm repair) | 2. Documented history of dementia                                                                                      |
| 3. Requiring spinal drain for surgery that is predicted to stay in two or more days                                                 | 3. Unable to communicate with the research staff due to language barriers                                              |
| 4. Willing and able to provide informed consent                                                                                     | 4. Individuals who the PI determines are not appropriate for the study such as a history of appointment cancellations. |
|                                                                                                                                     | 5. Pregnant or Nursing                                                                                                 |
|                                                                                                                                     | 6. Prisoners                                                                                                           |

**Supplementary Table 2. Inclusion and exclusion criteria for the IPOD-B3 cohort (NCT03124303).**

| Inclusion Criteria                                                                                                        | Exclusion Criteria                                                                                                                                                |
|---------------------------------------------------------------------------------------------------------------------------|-------------------------------------------------------------------------------------------------------------------------------------------------------------------|
| 1. Age $\geq 65$ years                                                                                                    | 1. Contraindication to EEG,                                                                                                                                       |
| 2. Anticipated length of hospital stay of at least 2 days after surgery that occurs under general or neuraxial anesthesia | 2. Unable or unwilling to attend the follow-up appointments,                                                                                                      |
| 4. Written Informed Consent prior to surgery                                                                              | 3. Documented history of dementia                                                                                                                                 |
|                                                                                                                           | 4. Deemed incapable of providing consent by surgical team                                                                                                         |
|                                                                                                                           | 4. Residing in a nursing home,                                                                                                                                    |
|                                                                                                                           | 5. Undergoing intracranial surgery                                                                                                                                |
|                                                                                                                           | 6. Unable to complete neurocognitive testing due to language, vision or hearing impairment,                                                                       |
|                                                                                                                           | 7. Unable to communicate with the research staff due to language barriers,                                                                                        |
|                                                                                                                           | 8. For optional MRI portion of the study: Contraindication to MRI (e.g., implanted devices not safe for MRI studies, claustrophobia, unable to lie flat or still) |

**Supplementary Table 3. Clinical and demographic data for the cohort**

|                                   | Delirious                                                                                              | Non-delirious                                                                                          |
|-----------------------------------|--------------------------------------------------------------------------------------------------------|--------------------------------------------------------------------------------------------------------|
| Age (Years)                       | 68.91 ± 8.61                                                                                           | 72.13 ± 5.66                                                                                           |
| Sex (F)                           | 49%                                                                                                    | 29%                                                                                                    |
| Peak DRS                          | 19.66 ± 6.50                                                                                           | 9.25 ± 2.48                                                                                            |
| ASA score                         | 3.00 ± 0.64                                                                                            | 2.72 ± 0.68                                                                                            |
| Diabetes                          | 20%                                                                                                    | 82%                                                                                                    |
| Tobacco user                      | 86%                                                                                                    | 71%                                                                                                    |
| COPD                              | 39%                                                                                                    | 13%                                                                                                    |
| Obstructive Sleep Apnoea          | 31%                                                                                                    | 24%                                                                                                    |
| Body Mass Index                   | 28.34 ± 4.87                                                                                           | 28.04 ± 4.82                                                                                           |
| Hypertension                      | 89%                                                                                                    | 76%                                                                                                    |
| Stroke/Transient Ischaemic Attack | Stroke: 6%, TIA: 14%                                                                                   | Stroke: 2%, TIA: 2%                                                                                    |
| Surgery Type                      | Vascular: 63%,<br>Thoracic: 0%,<br>General: 3%,<br>Orthopedic: 20%,<br>Urological: 3%,<br>Cardiac: 11% | Vascular: 29%,<br>Thoracic: 2%,<br>General: 5%,<br>Orthopedic: 42%,<br>Urological: 7%,<br>Cardiac: 15% |
| Blood loss (mL)                   | 4230.91 ± 4452.41                                                                                      | 680.29 ± 1064.14                                                                                       |
| Operative time (min)              | 452.17 ± 219.93                                                                                        | 275.11 ± 125.70                                                                                        |

*Note:* Values show mean ± SD or percent. DRS, Delirium Rating Scale-98-R.

**Supplementary Table 4. Linear regression**

|                | Estimate | SE    | t     | p      |
|----------------|----------|-------|-------|--------|
| DRS~1+LZC+SWA  |          |       |       |        |
| LZC            | -30.89   | 10.40 | -2.97 | 0.004  |
| SWA            | 1.92     | 2.06  | 0.93  | 0.354  |
| DRS~1+LZCn+SWA |          |       |       |        |
| LZCn           | -29.87   | 14.50 | -2.06 | 0.042  |
| SWA            | 5.48     | 1.58  | 3.47  | <0.001 |

*Note:* Linear regression fit on pre- to post-operative changes (channel 179, N = 89). Channel 179 is in the peak effect overlap of LZC and LZCn correlation with DRS. DRS, Delirium Rating Scale-98-R; LZC, Lempel Ziv Complexity; LZCn, phase shuffle normalized Lempel Ziv Complexity; SWA, slow wave activity.
